# Supplementary material for: Two-shell structured PMAA@CeO2 nanocontainers loaded with 2-mercaptobenzothiazole for corrosion protection of damaged epoxy coated AA 2024-T3
Source: Royal Society of Chemistry journal article supplement (doi:10.1039/c7nr00858a), 2017-01-01
Supplement: c7nr00858a1.pdf [file c7nr00858a1.pdf]

**Table 2. Fitted parameters obtained from the circuit presented in figure 8.a for the epoxy coating without any inhibitor on AA 2024-T3 after 312, 1000, 1272, 1800, 2376, 2448, 4176 and 4224 hours in 3.5% NaCl solution.**

| <b>Time</b>                  | hours                         | <b>312</b>  |              | <b>1000</b> |              | <b>1272</b> |              | <b>1800</b> |              |
|------------------------------|-------------------------------|-------------|--------------|-------------|--------------|-------------|--------------|-------------|--------------|
|                              |                               |             | <b>error</b> |             | <b>error</b> |             | <b>error</b> |             | <b>error</b> |
| <b>R<sub>sol</sub></b>       | $\Omega \text{ cm}^2$         | 26.4        | $\pm 0.109$  | 30.4        | $\pm 0.021$  | 29          | $\pm 0.179$  | 32.7        | $\pm 0.399$  |
| <b>C<sub>coat</sub></b>      | $\text{nF cm}^{-2}$           | 0.731       | $\pm 0.063$  | 0.702       | $\pm 0.0198$ | 0.752       | $\pm 0.045$  | 0.749       | $\pm 0.026$  |
| <b>n<sub>coat</sub></b>      |                               | 0.967       | $\pm 0.008$  | 0.978       | $\pm 0.003$  | 0.973       | $\pm 0.006$  | 0.976       | $\pm 0.003$  |
| <b>R<sub>po</sub></b>        | $\text{G}\Omega \text{ cm}^2$ | 0.959       | $\pm 0.159$  | 1.29        | $\pm 0.028$  | 1.73        | $\pm 0.067$  | 1.99        | $\pm 0.046$  |
| <b>C<sub>inter</sub></b>     | $\text{nF cm}^{-2}$           | 0.084       | $\pm 1.05$   | 0.228       | $\pm 0.163$  | 0.658       | $\pm 0.366$  | 1.08        | $\pm 0.136$  |
| <b>R<sub>charge tr</sub></b> | $\text{G}\Omega \text{ cm}^2$ | 4.28        | $\pm 0.091$  | 4.91        | $\pm 0.065$  | 2.6         | $\pm 0.194$  | 4.55        | $\pm 0.093$  |
|                              |                               |             |              |             |              |             |              |             |              |
| <b>Time</b>                  | hours                         | <b>2376</b> |              | <b>2448</b> |              | <b>4176</b> |              | <b>4224</b> |              |
|                              |                               |             | <b>error</b> |             | <b>error</b> |             | <b>error</b> |             | <b>error</b> |
| <b>R<sub>sol</sub></b>       | $\Omega \text{ cm}^2$         | 35.3        | $\pm 0.03$   | 21.3        | $\pm 0.038$  | 21.1        | $\pm 0.042$  | 22.1        | $\pm 0.041$  |
| <b>C<sub>coat</sub></b>      | $\text{nF cm}^{-2}$           | 0.851       | $\pm 0.013$  | 0.834       | $\pm 0.025$  | 1.1         | $\pm 0.016$  | 1.15        | $\pm 0.018$  |
| <b>n<sub>coat</sub></b>      |                               | 0.969       | $\pm 0.002$  | 0.971       | $\pm 0.003$  | 0.961       | $\pm 0.002$  | 0.956       | $\pm 0.002$  |
| <b>R<sub>po</sub></b>        | $\text{G}\Omega \text{ cm}^2$ | 3.068       | $\pm 0.041$  | 2           | $\pm 0.047$  | 1.21        | $\pm 0.033$  | 1.4         | $\pm 0.053$  |
| <b>C<sub>inter</sub></b>     | $\text{nF cm}^{-2}$           | 1.51        | $\pm 0.102$  | 0.729       | $\pm 0.221$  | 1.21        | $\pm 0.132$  | 1.73        | $\pm 0.2$    |
| <b>R<sub>charge tr</sub></b> | $\text{G}\Omega \text{ cm}^2$ | 4.07        | $\pm 0.074$  | 2.51        | $\pm 0.109$  | 1.47        | $\pm 0.054$  | 1.08        | $\pm 0.098$  |

**Table 3. Fitted parameters obtained from the circuit presented in figure 8.a for the epoxy coating with 2-MBT on AA 2024-T3 after 700, 1000, 1272, and 4224 hours in 3.5% NaCl solution.**

| Time                    | hours                         | 700   |              | 1000  |              | 1272  |              | 4224  |              |
|-------------------------|-------------------------------|-------|--------------|-------|--------------|-------|--------------|-------|--------------|
|                         |                               |       | <b>error</b> |       | <b>error</b> |       | <b>error</b> |       | <b>error</b> |
| $R_{sol}$               | $\Omega \text{ cm}^2$         | 15.2  | $\pm 0.084$  | 18    | $\pm 0.133$  | 9.01  | $\pm 0.039$  | 5.52  | $\pm 0.071$  |
| $C_{coat}$              | $\text{nF cm}^{-2}$           | 0.702 | $\pm 0.019$  | 0.776 | $\pm 0.02$   | 0.836 | $\pm 0.014$  | 1.10  | $\pm 0.022$  |
| $n_{coat}$              |                               | 0.976 | $\pm 0.002$  | 0.972 | $\pm 0.002$  | 0.968 | $\pm 0.002$  | 0.957 | $\pm 0.003$  |
| $R_{po}$                | $\text{G}\Omega \text{ cm}^2$ | 0.308 | $\pm 0.023$  | 0.266 | $\pm 0.028$  | 0.418 | $\pm 0.02$   | 0.148 | $\pm 0.031$  |
| $C_{inter}$             | $\text{nF cm}^{-2}$           | 5.89  | $\pm 0.046$  | 8.43  | $\pm 0.098$  | 8.88  | $\pm 0.045$  | 8.42  | $\pm 0.111$  |
| $R_{charge \text{ tr}}$ | $\text{G}\Omega \text{ cm}^2$ | 0.76  | $\pm 0.029$  | 0.231 | $\pm 0.047$  | 0.632 | $\pm 0.037$  | 0.136 | $\pm 0.051$  |

**Table 4. Fitted parameters obtained from the circuit presented in figure 8.a for the epoxy coating containing PMAA@CeO<sub>2</sub> nanocontainers loaded with 2-MBT on AA 2024-T3 after 312, 432, 1000, 1272, 2376 and 2448 hours in 3.5% NaCl solution.**

| Time                    | hours                         | 312   |              | 432   |              | 1000  |              | 1272  |              | 2376  |              | 2448  |              |
|-------------------------|-------------------------------|-------|--------------|-------|--------------|-------|--------------|-------|--------------|-------|--------------|-------|--------------|
|                         |                               |       | <b>error</b> |
| $R_{sol}$               | $\Omega \text{ cm}^2$         | 27.2  | $\pm 0.048$  | 29.7  | $\pm 0.075$  | 16.2  | $\pm 0.047$  | 17.9  | $\pm 0.056$  | 19.2  | $\pm 0.07$   | 16.1  | $\pm 0.034$  |
| $C_{coat}$              | $\text{nF cm}^{-2}$           | 0.58  | $\pm 0.013$  | 0.595 | $\pm 0.017$  | 0.684 | $\pm 0.016$  | 0.929 | $\pm 0.017$  | 0.845 | $\pm 0.013$  | 0.88  | $\pm 0.02$   |
| $n_{coat}$              |                               | 0.975 | $\pm 0.002$  | 0.974 | $\pm 0.002$  | 0.97  | $\pm 0.002$  | 0.942 | $\pm 0.002$  | 0.958 | $\pm 0.002$  | 0.956 | $\pm 0.002$  |
| $R_{po}$                | $\text{G}\Omega \text{ cm}^2$ | 0.648 | $\pm 0.024$  | 0.867 | $\pm 0.031$  | 0.55  | $\pm 0.027$  | 0.77  | $\pm 0.03$   | 0.64  | $\pm 0.027$  | 0.678 | $\pm 0.059$  |
| $C_{inter}$             | $\text{nF cm}^{-2}$           | 6.14  | $\pm 0.094$  | 3.72  | $\pm 0.102$  | 3.29  | $\pm 0.092$  | 5.69  | $\pm 0.113$  | 2.13  | $\pm 0.077$  | 1.98  | $\pm 0.074$  |
| $R_{charge \text{ tr}}$ | $\text{G}\Omega \text{ cm}^2$ | 0.394 | $\pm 0.046$  | 0.769 | $\pm 0.043$  | 0.579 | $\pm 0.054$  | 0.677 | $\pm 0.061$  | 0.947 | $\pm 0.05$   | 0.394 | $\pm 0.046$  |

**Table 5. Fitted parameters obtained from the circuit presented in figure 8.b for the scribed epoxy coating without any inhibitor on AA 2024-T3 after 24, 48 and 72 hours in 3.5% NaCl solution.**

| <b>Time</b>                            | hours                         | <b>24</b>             |              | <b>48</b>             |              | <b>72</b>             |              |
|----------------------------------------|-------------------------------|-----------------------|--------------|-----------------------|--------------|-----------------------|--------------|
|                                        |                               |                       | <b>error</b> |                       | <b>error</b> |                       | <b>error</b> |
| <b>R<sub>sol</sub></b>                 | $\Omega \text{ cm}^2$         | 26.4                  | fixed        | 26.4                  | fixed        | 26.4                  | fixed        |
| <b>C<sub>coat</sub></b>                | $\text{nF cm}^{-2}$           | 50.3                  | fixed        | 297                   | fixed        | 309                   | fixed        |
| <b>n<sub>coat</sub></b>                |                               | 0.908                 | fixed        | 0.717                 | fixed        | 0.713                 | fixed        |
| <b>R<sub>po</sub></b>                  | $\text{G}\Omega \text{ cm}^2$ | 0.959                 | fixed        | 0.959                 | fixed        | 0.959                 | fixed        |
| <b>C<sub>coat inter</sub></b>          | $\text{nF cm}^{-2}$           | $8.38 \times 10^{-2}$ | fixed        | $8.38 \times 10^{-2}$ | fixed        | $8.38 \times 10^{-2}$ | fixed        |
| <b>R<sub>charge tr unscribed</sub></b> | $\text{G}\Omega \text{ cm}^2$ | 4.28                  | fixed        | 4.28                  | fixed        | 4.28                  | fixed        |
| <b>R<sub>sol scr</sub></b>             | $\Omega \text{ cm}^2$         | 74.769                | $\pm 0.105$  | 85.223                | $\pm 0.051$  | 93.208                | $\pm 0.039$  |
| <b>R<sub>corr pr</sub></b>             | $\Omega \text{ cm}^2$         | 416.41                | $\pm 0.845$  | 4441.9                | $\pm 0.226$  | 5559                  | $\pm 0.149$  |
| <b>C<sub>oxide</sub></b>               | $\mu\text{F cm}^{-2}$         | 1.06                  | $\pm 1.28$   | 4.20                  | $\pm 0.158$  | 5.25                  | $\pm 0.104$  |
| <b>n<sub>oxide</sub></b>               |                               | 0.908                 | $\pm 0.13$   | 0.825                 | $\pm 0.02$   | 0.815                 | $\pm 0.014$  |
| <b>C<sub>dl</sub></b>                  | $\mu\text{F cm}^{-2}$         | 1.04                  | $\pm 1.27$   | 6.99                  | $\pm 0.4$    | 0.794                 | $\pm 0.273$  |
| <b>n<sub>dl</sub></b>                  |                               | 0.881                 | $\pm 0.11$   | 1.03                  | $\pm 0.06$   | 1.09                  | $\pm 0.043$  |
| <b>R<sub>pol</sub></b>                 | $\text{k}\Omega \text{ cm}^2$ | 69.4                  | $\pm 0.025$  | 47.9                  | $\pm 0.022$  | 66.2                  | $\pm 0.023$  |
| <b>W<sub>s</sub>-R</b>                 | $\text{k}\Omega \text{ cm}^2$ | 470                   | $\pm 2.92$   | 34.2                  | $\pm 0.089$  | 44.4                  | $\pm 0.09$   |
| <b>W<sub>s</sub>-T</b>                 | $\text{sec}^{-1}$             | 565                   | $\pm 5.71$   | 28                    | $\pm 0.104$  | 32.9                  | $\pm 0.116$  |
| <b>W<sub>s</sub>-PHI</b>               |                               | 0.519                 | $\pm 0.042$  | 0.602                 | $\pm 0.047$  | 0.552                 | $\pm 0.058$  |

**Table 6. Fitted parameters obtained from the circuit presented in figure 8.b for the scribed epoxy coating containing PMAA@CeO<sub>2</sub> nanocontainers loaded with 2-MBT on AA 2024-T3 after 24, 48 and 72 hours in 3.5% NaCl solution.**

| <b>Time</b>                            | hours                         | <b>24</b>             |              | <b>48</b>             |              | <b>72</b>             |              |
|----------------------------------------|-------------------------------|-----------------------|--------------|-----------------------|--------------|-----------------------|--------------|
|                                        |                               |                       | <b>error</b> |                       | <b>error</b> |                       | <b>error</b> |
| <b>R<sub>sol</sub></b>                 | $\Omega \text{ cm}^2$         | 26.4                  | fixed        | 26.4                  | fixed        | 26.4                  | fixed        |
| <b>C<sub>coat</sub></b>                | $\text{nF cm}^{-2}$           | 89.3                  | fixed        | 102                   | fixed        | 125                   | fixed        |
| <b>n<sub>coat</sub></b>                |                               | 0.812                 | fixed        | 0.79                  | fixed        | 0.758                 | fixed        |
| <b>R<sub>po</sub></b>                  | $\text{G}\Omega \text{ cm}^2$ | 0.959                 | fixed        | 0.959                 | fixed        | 0.959                 | fixed        |
| <b>C<sub>coat inter</sub></b>          | $\text{nF cm}^{-2}$           | $8.38 \times 10^{-2}$ | fixed        | $8.38 \times 10^{-2}$ | fixed        | $8.38 \times 10^{-2}$ | fixed        |
| <b>R<sub>charge tr unscribed</sub></b> | $\text{G}\Omega \text{ cm}^2$ | 4.28                  | fixed        | 4.28                  | fixed        | 4.28                  | fixed        |
| <b>R<sub>sol scr</sub></b>             | $\Omega \text{ cm}^2$         | 89.7                  | $\pm 0.121$  | 92.2                  | $\pm 0.066$  | 101                   | $\pm 0.056$  |
| <b>R<sub>corr pr</sub></b>             | $\Omega \text{ cm}^2$         | 191                   | $\pm 0.392$  | 260                   | $\pm 0.245$  | 288                   | $\pm 0.223$  |
| <b>C<sub>oxide</sub></b>               | $\mu\text{F cm}^{-2}$         | 0.64                  | $\pm 1.41$   | 0.963                 | $\pm 0.743$  | 1.23                  | $\pm 0.648$  |
| <b>n<sub>oxide</sub></b>               |                               | 0.951                 | $\pm 0.14$   | 0.945                 | $\pm 0.078$  | 0.937                 | $\pm 0.07$   |
| <b>C<sub>dl</sub></b>                  | $\mu\text{F cm}^{-2}$         | 1.25                  | $\pm 0.598$  | 1.60                  | $\pm 0.367$  | 1.93                  | $\pm 0.332$  |
| <b>n<sub>dl</sub></b>                  |                               | 0.947                 | $\pm 0.053$  | 0.953                 | $\pm 0.035$  | 0.954                 | $\pm 0.032$  |
| <b>R<sub>pol</sub></b>                 | $\text{k}\Omega \text{ cm}^2$ | 117                   | $\pm 0.044$  | 146                   | $\pm 0.04$   | 151                   | $\pm 0.061$  |
| <b>W<sub>s-R</sub></b>                 | $\text{k}\Omega \text{ cm}^2$ | 1439                  | $\pm 0.04$   | 641                   | $\pm 0.037$  | 514                   | $\pm 0.054$  |
| <b>W<sub>s-T</sub></b>                 | $\text{sec}^{-1}$             | 69.4                  | $\pm 0.058$  | 44.9                  | $\pm 0.065$  | 52.1                  | $\pm 0.112$  |
| <b>W<sub>s-PHI</sub></b>               |                               | 0.59                  | $\pm 0.012$  | 0.533                 | $\pm 0.02$   | 0.454                 | $\pm 0.035$  |
